# Supplementary material for: Can Teledentistry Replace Conventional Clinical Follow-Up Care for Minor Dental Surgery? A Prospective Randomized Clinical Trial
Source: MDPI journal article supplement (doi:10.3390/ijerph19063444), 2022-03-15
Supplement: s1 [file s1]

**Table S1.** Descriptives of surgeries performed during the study.

| <b>Dentoalveolar Surgery</b> | <b>Telephone follow-up</b> |           | <b>Conventional follow-up</b> |           | <b>Total</b> |           | <b><i>p</i></b> |
|------------------------------|----------------------------|-----------|-------------------------------|-----------|--------------|-----------|-----------------|
|                              | <b>n</b>                   | <b>%</b>  | <b>n</b>                      | <b>%</b>  | <b>n</b>     | <b>%</b>  |                 |
| Tooth extraction             | 21                         | 63.6      | 20                            | 57.1      | 41           | 60.3      | 0.587           |
| Osteotomy Wisdom tooth       | 9                          | 27.3      | 8                             | 22.9      | 17           | 25        | 0.677           |
| Osteotomy                    | 3                          | 9.1       | 7                             | 20        | 10           | 14.7      | 0.208           |
| Suture                       | 22                         | 66.7      | 26                            | 74.3      | 48           | 70.6      | 0.494           |
|                              | <b>Mean</b>                | <b>SD</b> | <b>Mean</b>                   | <b>SD</b> | <b>Mean</b>  | <b>SD</b> |                 |
| Teeth                        | 2                          | 2.3       | 1.8                           | 1.5       | 1.9          | 1.9       | 0.910           |

**Table S2.** Results of the questionnaire for both groups.

| <b>Question</b>                        | <b>Telephone follow-up</b> |           | <b>Conventional follow-up</b> |           | <b>Total</b> |           | <b><i>p</i></b> |
|----------------------------------------|----------------------------|-----------|-------------------------------|-----------|--------------|-----------|-----------------|
|                                        | <b>n</b>                   | <b>%</b>  | <b>n</b>                      | <b>%</b>  | <b>n</b>     | <b>%</b>  |                 |
| Feeling sick [yes/no]                  | 2/28                       | 6.7/93.3  | 0/30                          | 0/100     | 2/58         | 3.3/96.7  | 0.154           |
| Pain medication [yes/no]               | 5/25                       | 16.7/83.3 | 5/25                          | 16.7/83.3 | 10/5         | 16.7/83.3 | 1.00            |
| Daily activity [yes/no]                | 27/3                       | 90/10     | 27/3                          | 90/10     | 54/6         | 90/10     | 1.00            |
| Concerns [yes/no]                      | 4/26                       | 13.3/86.7 | 1/29                          | 3.3/96.7  | 5/55         | 8.3/91.7  | 0.165           |
| Soft food [yes/no]                     | 11/19                      | 36.7/63.3 | 15/15                         | 50/50     | 26/3         | 43.3/56.7 | 0.301           |
| Bleeding [yes/no]                      | 0/30                       | 0/100     | 1/29                          | 3.3/96.7  | 1/59         | 1.7/98.3  | 0.317           |
| Swelling/Fever [yes/no]                | 1/29                       | 3.3/96.7  | 2/28                          | 6.7/93.3  | 3/57         | 5/95      | 0.557           |
| Problems swallowing/breathing [yes/no] | 0/30                       | 0/100     | 0/30                          | 0/100     | 0/60         | 0/100     | 1.00            |
| Satisfied [yes/no]                     | 30/0                       | 100/0     | 30/0                          | 100/0     | 60/0         | 100/0     | 1.00            |
| Remaining questions [yes/no]           | 10/20                      | 33.3/66.7 | 5/25                          | 16.7/83.3 | 15/4         | 25/75     | 0.139           |
| Wish face-to-face follow-up [yes/no]   | 5/25                       | 16.7/83.3 | 12/18                         | 40/60     | 17/4         | 28.3/71.7 | 0.047           |
| Long travel time [yes/no]              | –                          | –         | 18/12                         | 60/40     |              |           |                 |
| Face-to-face follow-up needed [yes/no] | 2/28                       | 6.7/93.3  | 3/27                          | 10/90     | 5/55         | 8.3/92,7  | 0.643           |
| Requirement to treat complication      | 2/28                       | 6.7/93.3  | 3/27                          | 10/90     | 5/55         | 8.3/92,7  | 0.634           |
|                                        | <b>Mean</b>                | <b>SD</b> | <b>Mean</b>                   | <b>SD</b> | <b>Mean</b>  | <b>SD</b> |                 |
| Waiting time [min]                     | –                          | –         | 12.8                          | 11.5      |              |           |                 |
| Duration of appointment [min]          | 3.9                        | 2.1       | 4.7                           | 3.9       | 4.3          | 3.1       | 0.178           |
